# Supplementary material for: Body mass index and adiposity influence responses to immune checkpoint inhibition in endometrial cancer
Source: PubMed Central journal article supplement (PMC11364395; doi:10.1172/jci180516), 2024-06-20
Supplement: jci-134-180516-s146.pdf [file jci-134-180516-s146.pdf]

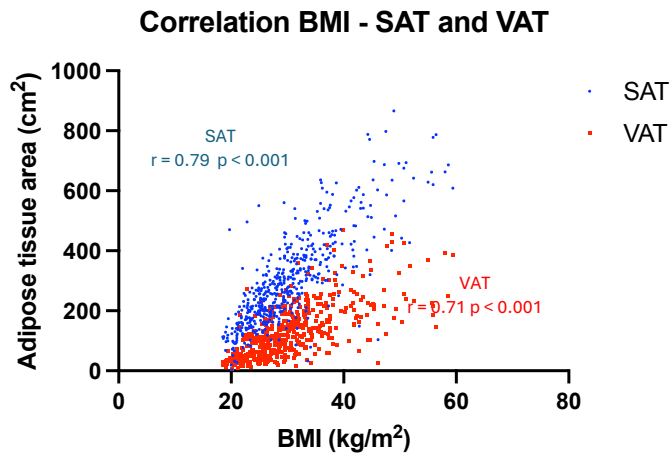

**Supplemental Figure 1. Correlation between BMI and VAT or SAT area.** Scatterplots depicting the correlation between BMI and VAT and SAT area. Correlation was assessed by Spearman's rank correlation coefficient  $n=500$ . BMI, body mass index; VAT, visceral adipose tissue; SAT, subcutaneous adipose tissue.

A.

## EC patients treated with ICI stratified by VAT area (quartiles)

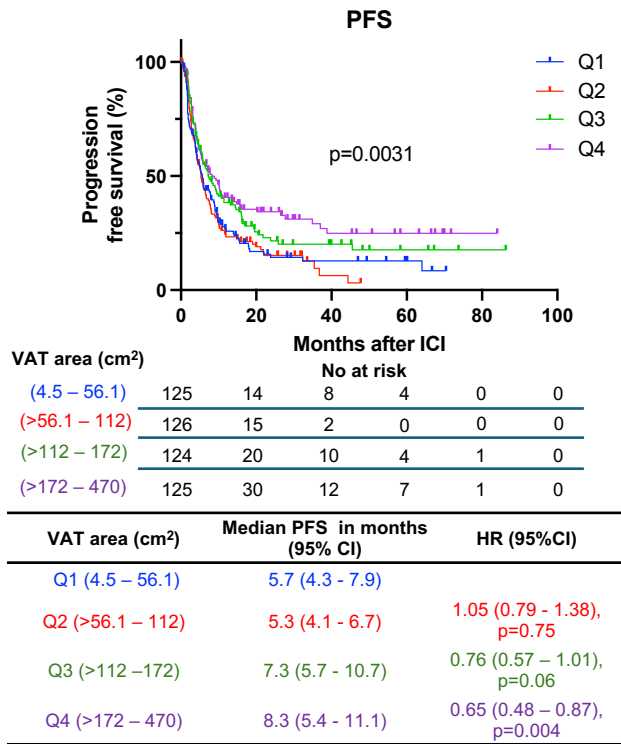

B.

## EC patients treated with ICI stratified by VAT area (quartiles)

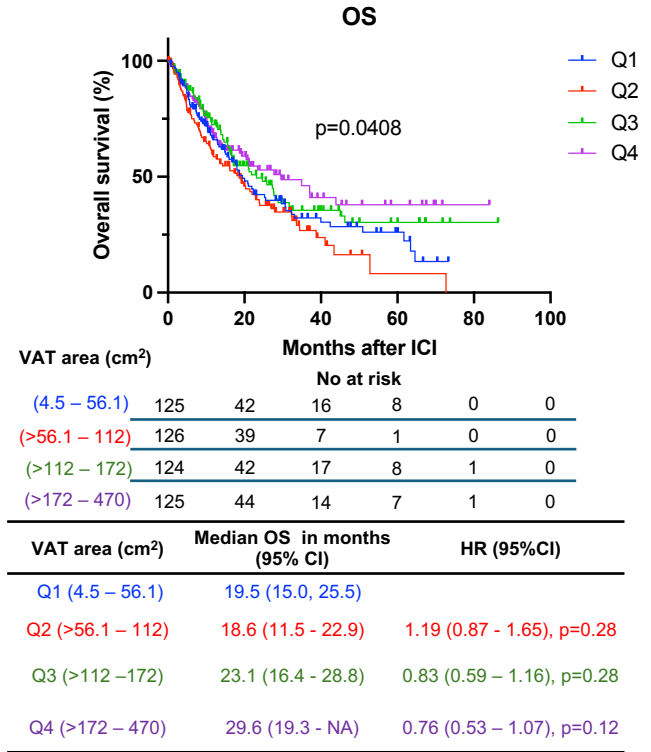

C.

## EC patients treated with ICI stratified by SAT area (quartiles)

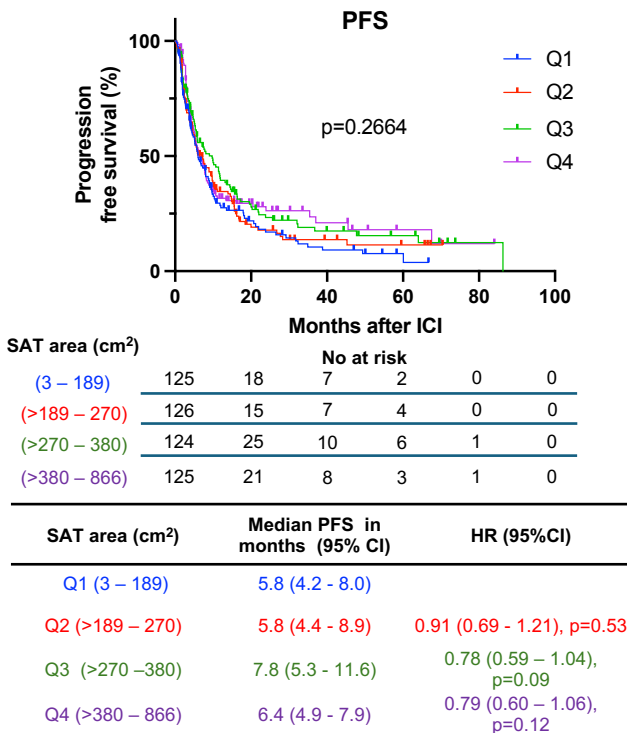

D.

## EC patients treated with ICI stratified by SAT area (quartiles)

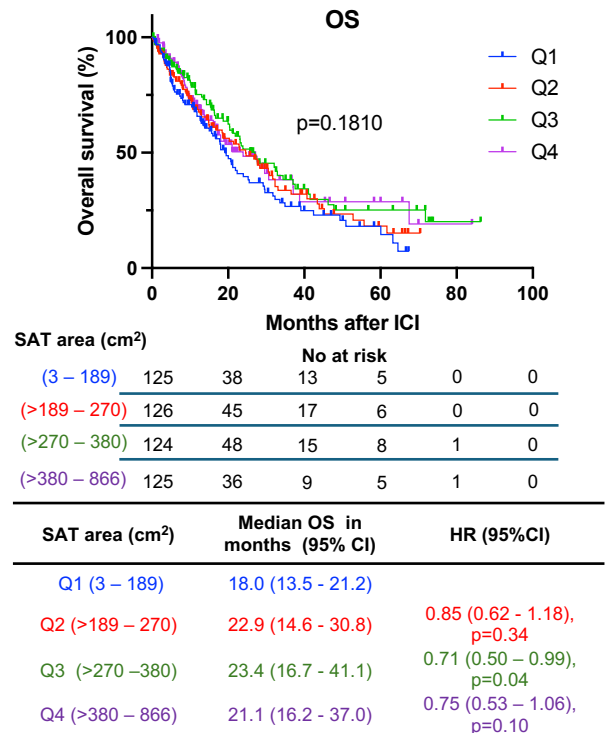

**Supplemental Figure 2. Survival outcomes after ICI in EC stratified by VAT and SAT area quartiles.** Kaplan-Meier curves for (A) PFS and (B) OS in patients with EC following ICI treatment stratified by VAT area quartiles (Q1, 4.5 – 56.1 cm<sup>2</sup> in blue; Q2, >56.1 – 112 cm<sup>2</sup> in red; Q3, >112 – 172 cm<sup>2</sup> in green; Q4, >172 – 470 cm<sup>2</sup> in purple) (n=500). Kaplan-Meier curves for (C) PFS and (D) OS in patients with EC following ICI treatment stratified by SAT area quartiles (Q1, 3 – 189 cm<sup>2</sup> in blue; Q2, >189 – 270 cm<sup>2</sup> in red; Q3, >270 – 380 cm<sup>2</sup> in green; Q4, >380 – 866 cm<sup>2</sup> in purple) (n=500). The P values in the PFS and OS plots were calculated using a log-rank test. HRs and 95% CIs were calculated using Q1 as a reference. BMI, body mass index; OS, overall survival; PFS, progression free survival; EC, endometrial cancer; ICI, immune checkpoint inhibitor; VAT, visceral adipose tissue; SAT, subcutaneous adipose tissue; HR, Hazard ratio; CI, confidence interval.

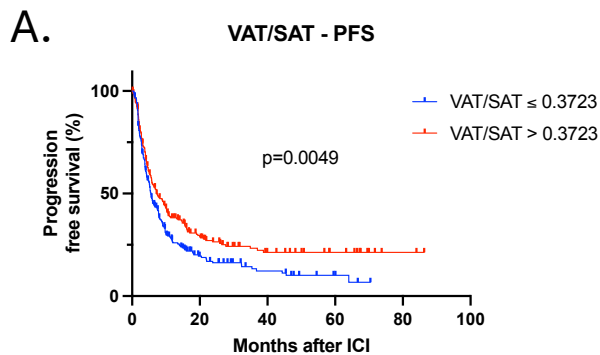

| VAT/SAT       | No at risk |    |    |    |   |   |
|---------------|------------|----|----|----|---|---|
| $\leq 0.3723$ | 250        | 30 | 12 | 4  | 0 | 0 |
| $> 0.3723$    | 250        | 49 | 20 | 11 | 2 | 0 |

| VAT/SAT       | Median PFS in months (95% CI) | HR (95%CI)         |
|---------------|-------------------------------|--------------------|
| $\leq 0.3723$ | 5.5 (4.8 – 6.7)               |                    |
| $> 0.3723$    | 7.25 (5.8 – 9.9)              | 0.75 (0.61 – 0.92) |

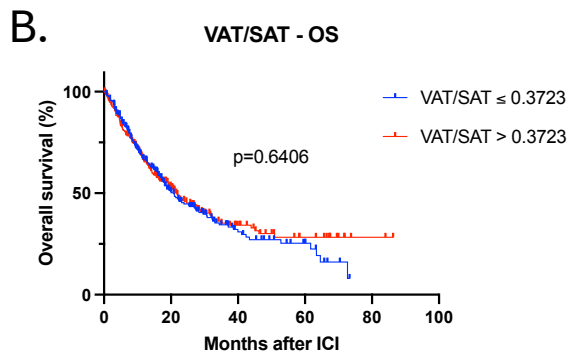

| VAT/SAT       | No at risk |    |    |    |   |   |
|---------------|------------|----|----|----|---|---|
| $\leq 0.3723$ | 250        | 85 | 25 | 11 | 0 | 0 |
| $> 0.3723$    | 250        | 82 | 29 | 13 | 2 | 0 |

| VAT/SAT       | Median OS in months (95% CI) | HR (95%CI)        |
|---------------|------------------------------|-------------------|
| $\leq 0.3723$ | 20.86 (17.2 – 27)            |                   |
| $> 0.3723$    | 21.86 (16.4 – 27.7)          | 0.94 (0.74 – 1.2) |

**Supplemental Figure 3. Survival outcomes after ICI in EC stratified by VAT/SAT ratio.** Kaplan-Meier curves for (A) PFS and (B) OS in patients with EC following ICI treatment stratified by VAT/SAT ratio (n=500) (Low VAT/SAT ratio:  $\leq 0.3723$  in blue; High VAT/SAT ratio:  $> 0.3723$  in red). Patients were categorized as low or high VAT /SAT based on the median SAT and VAT of the entire cohort. The P values in the in PFS and OS plots were calculated using a log-rank test. BMI, body mass index; OS, overall survival; PFS, progression free survival; EC, endometrial cancer; ICI, immune checkpoint inhibitor; VAT, visceral adipose tissue; SAT, subcutaneous adipose tissue; HR, Hazard ratio; CI, confidence interval.

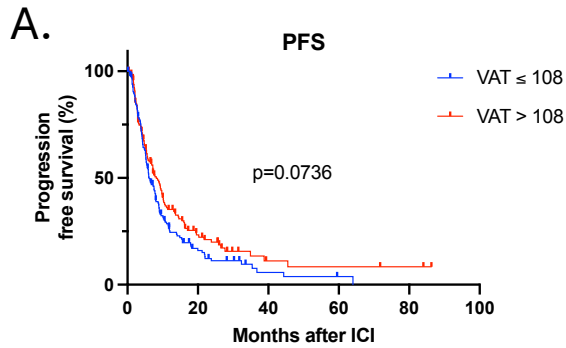

| VAT area (cm <sup>2</sup> ) |     | No at risk |   |   |   |   |  |
|-----------------------------|-----|------------|---|---|---|---|--|
| ≤108                        | 149 | 17         | 3 | 1 | 0 | 0 |  |
| >108                        | 147 | 22         | 4 | 3 | 2 | 0 |  |

  

| VAT area (cm <sup>2</sup> ) | Median PFS in months (95% CI) | HR (95%CI)         |
|-----------------------------|-------------------------------|--------------------|
| ≤108                        | 6.14 (5.3 – 8)                |                    |
| >108                        | 8.21 (5.8 – 9.9)              | 0.79 (0.61 – 1.02) |

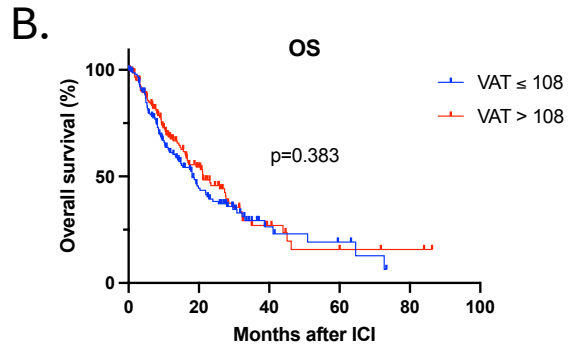

| VAT area (cm <sup>2</sup> ) |     | No at risk |   |   |   |   |  |
|-----------------------------|-----|------------|---|---|---|---|--|
| ≤108                        | 149 | 44         | 8 | 4 | 0 | 0 |  |
| >108                        | 147 | 47         | 9 | 4 | 2 | 0 |  |

  

| VAT area (cm <sup>2</sup> ) | Median OS in months (95% CI) | HR (95%CI)         |
|-----------------------------|------------------------------|--------------------|
| ≤108                        | 18.04 (13.5 – 22.4)          |                    |
| >108                        | 21.18 (16.4 – 27.7)          | 0.87 (0.64 – 1.19) |

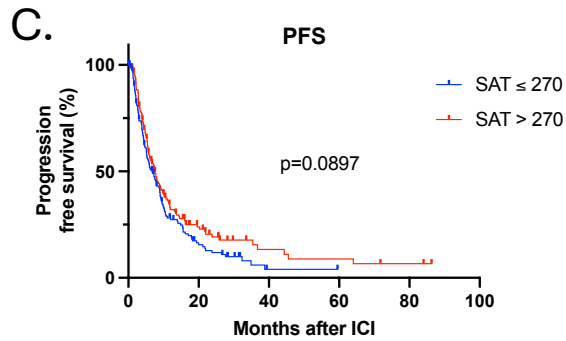

| SAT area (cm <sup>2</sup> ) |     | No at risk |   |   |   |   |  |
|-----------------------------|-----|------------|---|---|---|---|--|
| ≤270                        | 150 | 17         | 1 | 0 | 0 | 0 |  |
| >270                        | 146 | 22         | 6 | 4 | 2 | 0 |  |

  

| SAT area (cm <sup>2</sup> ) | Median PFS in months (95% CI) | HR (95%CI)        |
|-----------------------------|-------------------------------|-------------------|
| ≤270                        | 6.75 (5.1 – 8.9)              |                   |
| >270                        | 7.5 (5.8 – 9.3)               | 0.8 (0.62 – 1.04) |

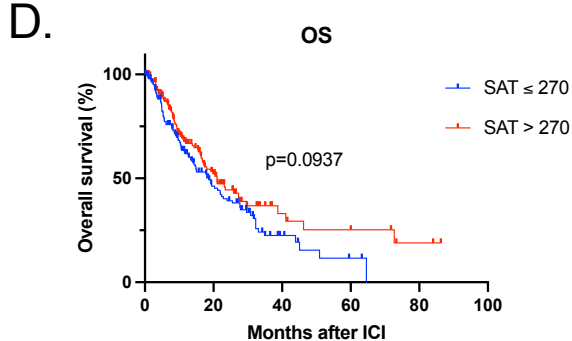

| SAT area (cm <sup>2</sup> ) |     | No at risk |   |   |   |   |  |
|-----------------------------|-----|------------|---|---|---|---|--|
| ≤270                        | 150 | 46         | 8 | 2 | 0 | 0 |  |
| >270                        | 146 | 45         | 9 | 6 | 2 | 0 |  |

  

| SAT area (cm <sup>2</sup> ) | Median OS in months (95% CI) | HR (95%CI)         |
|-----------------------------|------------------------------|--------------------|
| ≤270                        | 18.68 (13.5 – 22.9)          |                    |
| >270                        | 21 (16.7 – 27.6)             | 0.77 (0.56 – 1.05) |

**Supplemental Figure 4. Survival outcomes after Pembrolizumab and Lenvatinib in EC stratified by VAT and SAT area.** Kaplan-Meier curves for (A) PFS and (B) OS in patients with EC following ICI treatment stratified by low and high VAT area (n=296) (Low VAT area: ≤108 cm<sup>2</sup> in blue; High VAT area: >108 cm<sup>2</sup> in red). Kaplan-Meier curves for (C) PFS and (D) OS in patients with EC following ICI treatment stratified by low and high SAT area (Low SAT area: ≤270 cm<sup>2</sup> in blue; High SAT area: >270 cm<sup>2</sup> in red) (n=500). Patients were categorized as low or high VAT /SAT based on the median SAT and VAT of the patient sub-group treated with Pembrolizumab + Lenvatinib. The P values in the PFS and OS plots were calculated using a log-rank test. BMI, body mass index; OS, overall survival; PFS, progression free survival; EC, endometrial cancer; ICI, immune checkpoint inhibitor; VAT, visceral adipose tissue; SAT, subcutaneous adipose tissue; HR, Hazard ratio; CI, confidence interval

A.

PFS

Adjusted hazard ratio

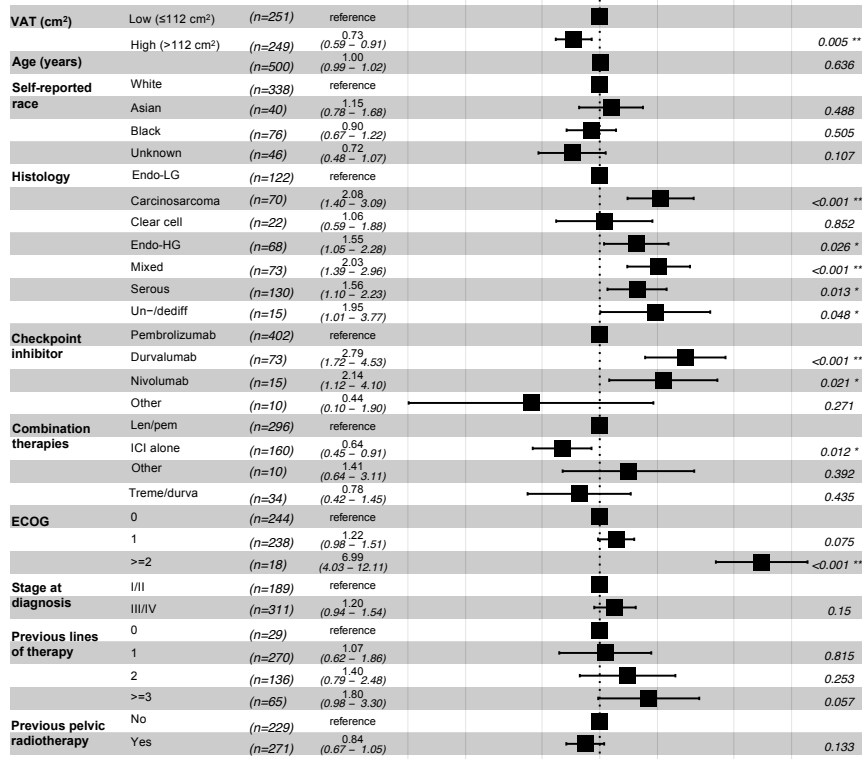

B.

OS

Adjusted hazard ratio

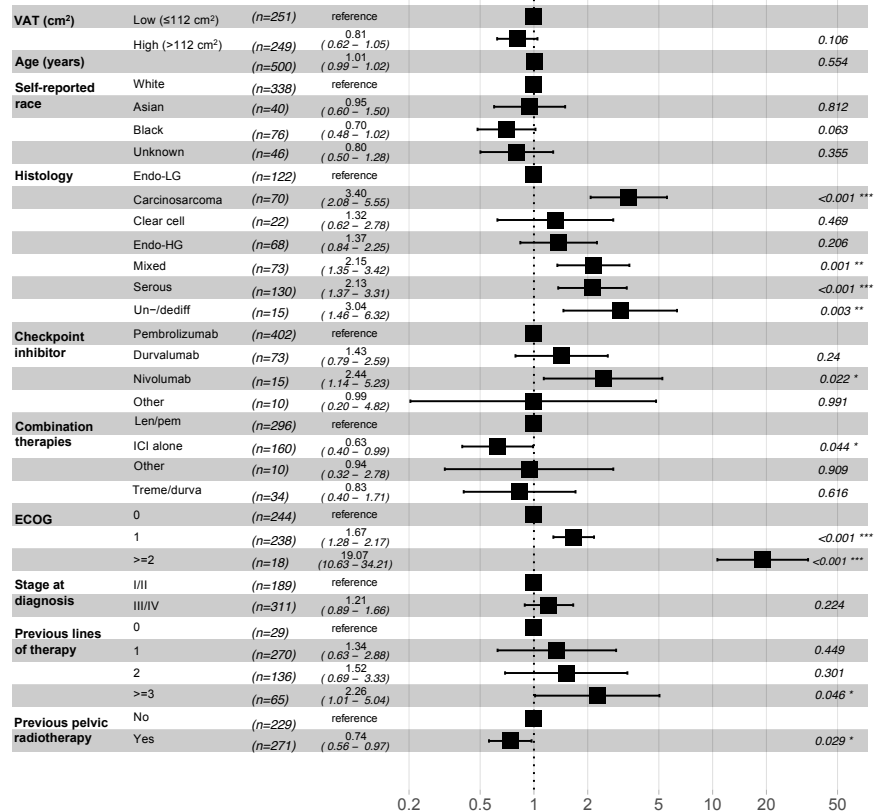

**Supplemental Figure 5. Multivariable Cox regression analysis of VAT and other clinical variables associated with responses to ICI in EC patients.** Forest plots of adjusted HRs and 95% CIs for patients with low VAT (reference group) compared to high VAT for (A) PFS and (B) OS (n=500). Analysis was adjusted for age, race, histology, type of checkpoint inhibitor, combination therapies, baseline performance status, stage at diagnosis, prior lines of therapy, and previous pelvic radiation. BMI, body mass index; OS, overall survival; PFS, progression free survival; EC, endometrial cancer; ICI, immune checkpoint inhibitor; VAT, visceral adipose tissue; Endo-LG, endometrial low grade; Endo-HG, endometrial high grade; Un-/dediff, Un-/dedifferentiated; Len/pem, Lenvatinib/pembrolizumab; Treme/durva, Tremelimumab/durvalumab; HR, Hazard ratio; CI, confidence interval.

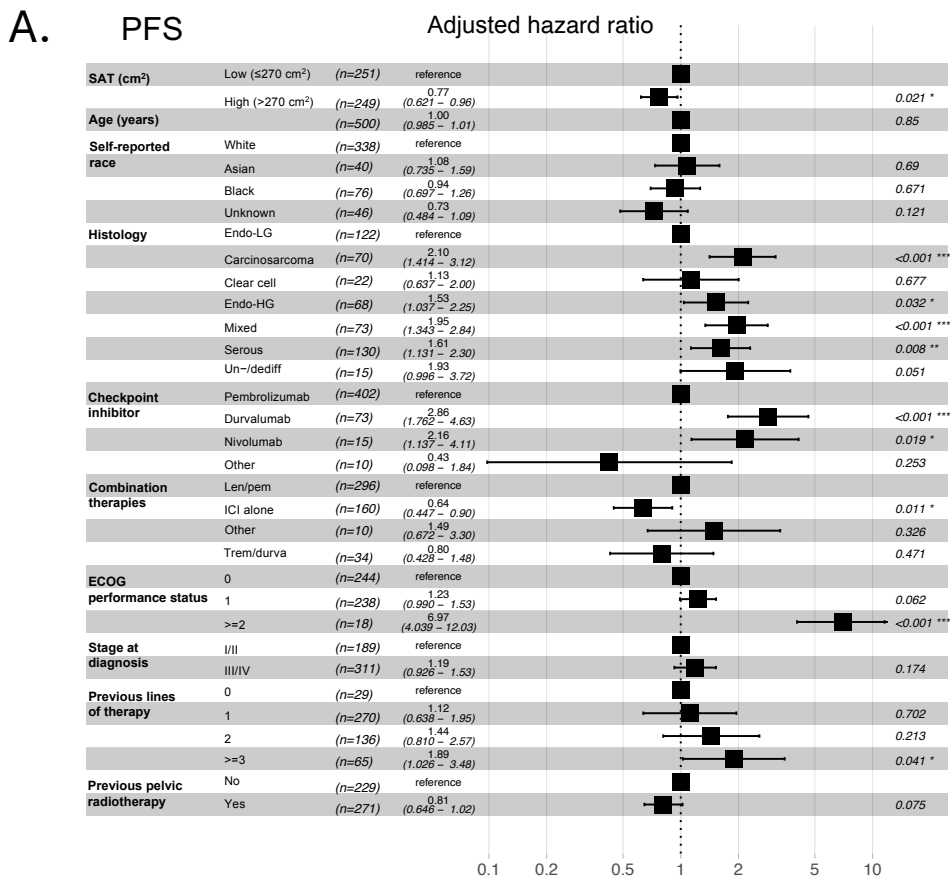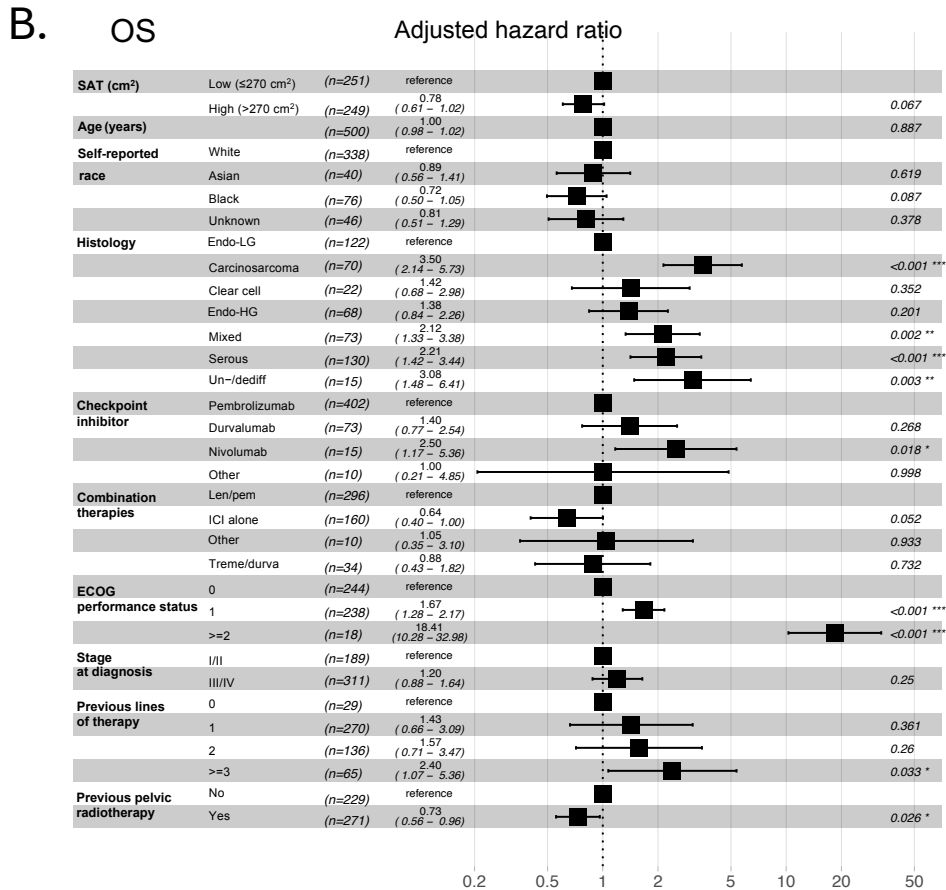

**Supplemental Figure 6. Multivariable Cox regression analysis of SAT and other clinical variables associated with responses to ICI in EC patients.** Forest plots of adjusted HRs and 95% CIs for patients with low SAT (reference group) compared to high SAT for (A) PFS and (B) OS (n=500). Analysis was adjusted for age, self-reported race, histology, type of checkpoint inhibitor, combination therapies, baseline performance status, stage at diagnosis, prior lines of therapy, and previous pelvic radiation. BMI, body mass index; OS, overall survival; PFS, progression free survival; EC, endometrial cancer; ICI, immune checkpoint inhibitor; SAT, subcutaneous adipose tissue; Endo-LG, endometrial low grade; Endo-HG, endometrial high grade; Un-/dediff, Un-/dedifferentiated; Len/pem, Lenvatinib/pembrolizumab; Treme/durva, Tremelimumab/durvalumab; HR, Hazard ratio; CI, confidence interval.

A.

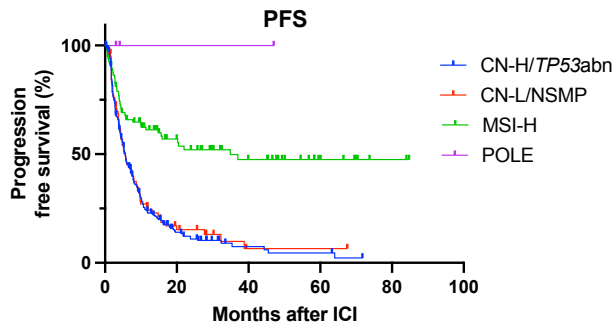

B.

EC patients treated with ICI stratified by molecular subtype

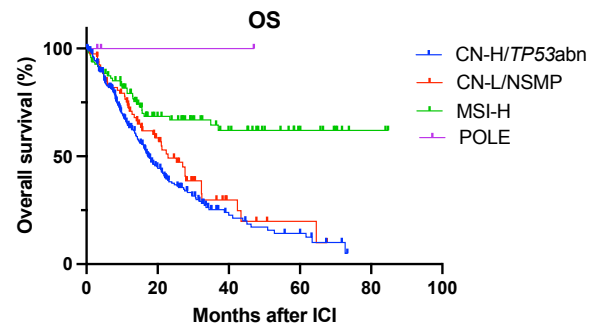

**Supplemental Figure 7. Survival outcomes in patients with EC stratified by molecular classification after ICI treatment.** Kaplan-Meier curves for (A) OS and (B) PFS in patients with EC following ICI treatment stratified by molecular subtype (n=437). OS, overall survival; PFS, progression free survival; EC, endometrial cancer; ICI, immune checkpoint inhibitor; CN-H/*TP53*abn, copy number-high/*TP53* abnormal; CN-L/NSMP, copy number-low/no specific molecular profile; MSI-H, microsatellite instability-high.

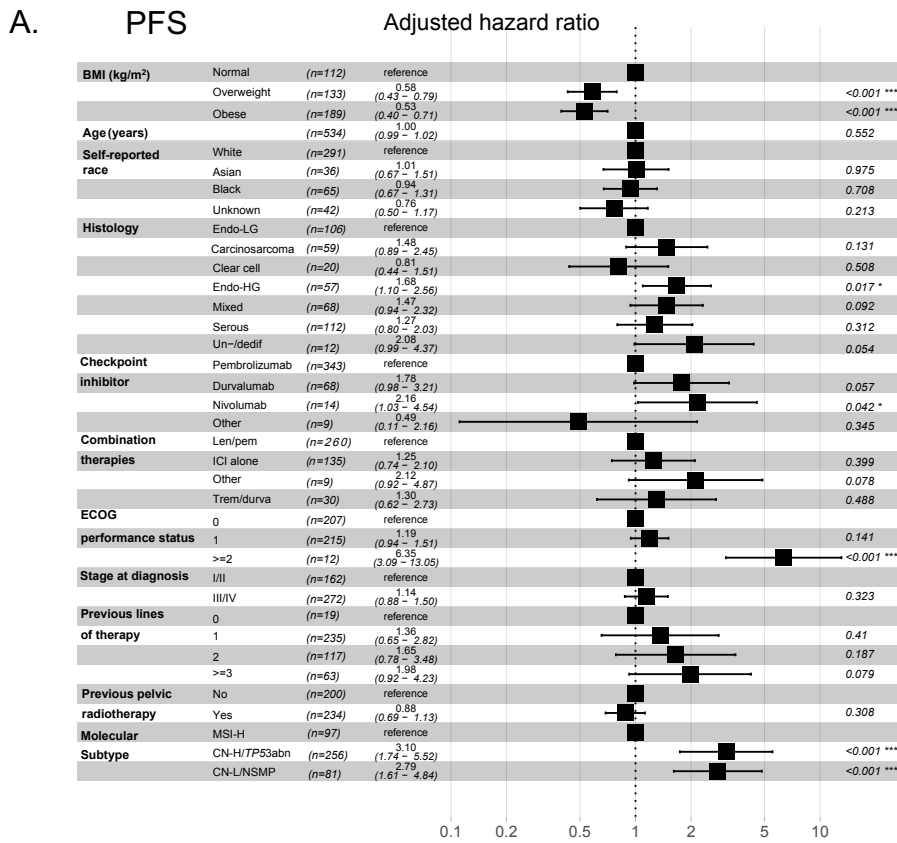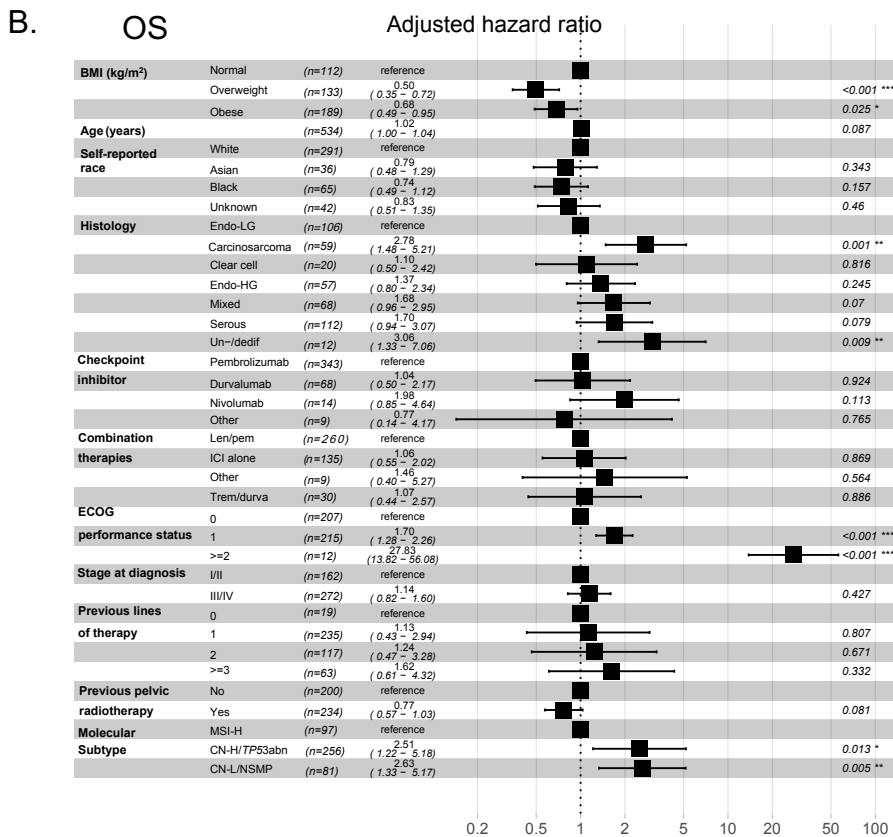

**Supplemental Figure 8. Multivariable regression analysis of clinical and molecular signatures associated with responses to ICI in EC patients.** Forest plots of adjusted HRs and 95% CIs for patients with normal BMI (18.5 – 24.9 kg/m<sup>2</sup>) (reference) compared to overweight (BMI 25 – 29.9 kg/m<sup>2</sup>) and obese (BMI > 30 kg/m<sup>2</sup>) patients for (A) PFS and (B) (OS) (n=434). There were a limited number of POLE patients (n=3), so they were not included in the analysis. Analysis was adjusted for age, self-reported race, histology, type of checkpoint inhibitor, combination therapies, baseline performance status, stage at diagnosis, prior lines of therapy, previous pelvic radiation and molecular subtype. BMI, body mass index; OS, overall survival; PFS, progression free survival; EC, endometrial cancer; ICI, immune checkpoint inhibitor; Endo-LG, endometrial low grade; Endo-HG, endometrial high grade; Un-/dedif, Un-/dedifferentiated; Len/pem, Lenvatinib/pembrolizumab; Treme/durva, Tremelimumab/durvalumab; CN-H/TP53abn, copy number-high/TP53 abnormal; CN-L/NSMP, copy number-low/no specific molecular profile; MSI-H, microsatellite instability-high; HR, Hazard ratio; CI, confidence interval.



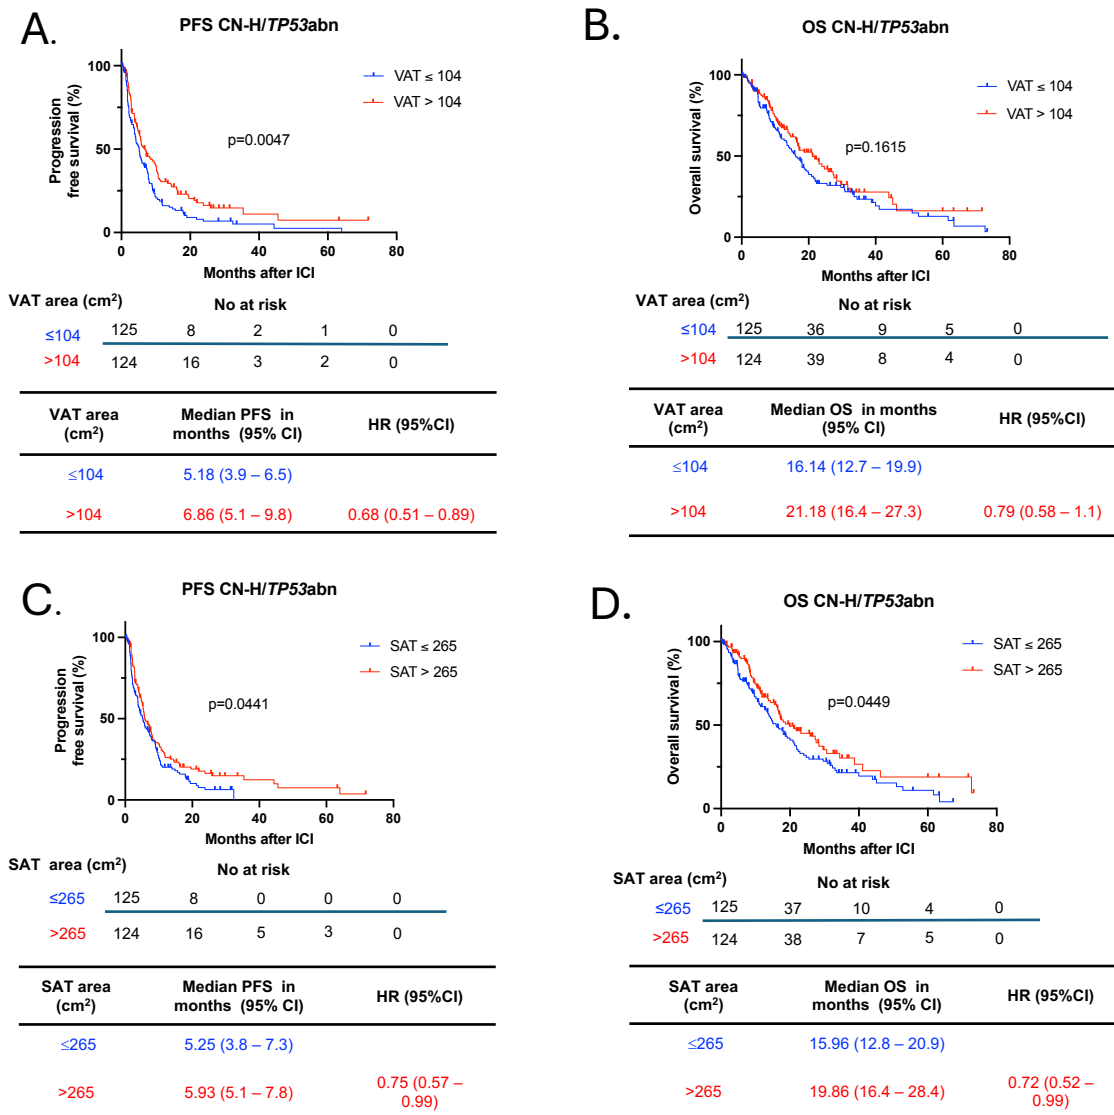

**Supplemental Figure 9. Survival outcomes in CN-H/TP53abn EC stratified by VAT and SAT area.** Kaplan-Meier curves for (A) PFS and (B) OS in patients with EC following ICI treatment stratified by low and high VAT area (n=249) (Low VAT area: ≤104 cm<sup>2</sup> in blue; High VAT area: >104 cm<sup>2</sup> in red). Kaplan-Meier curves for (C) PFS and (D) OS in patients with EC following ICI treatment stratified by low and high SAT area (Low SAT area: ≤265 cm<sup>2</sup> in blue; High SAT area: >265 cm<sup>2</sup> in red) (n=249). Patients were categorized as low or high VAT /SAT based on the median SAT and VAT area of the CN-H/TP53abn EC patients with available radiological data. The P values were calculated using a log-rank test. HRs and 95% CIs for overweight and obese patients were calculated using normal weight as a reference. BMI, body mass index; VAT, visceral adipose tissue; SAT, subcutaneous adipose tissue; OS, overall survival; PFS, progression free survival; EC, endometrial cancer; ICI, immune checkpoint inhibitor; CN-H/TP53abn, copy number-high/TP53abnormal; HR, Hazard ratio; CI, confidence interval.

A.

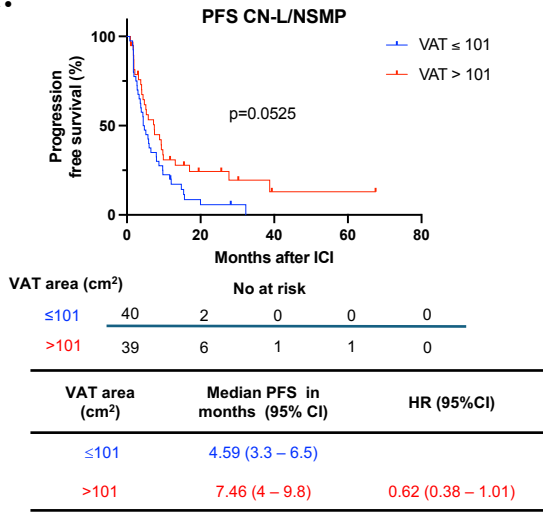

B.

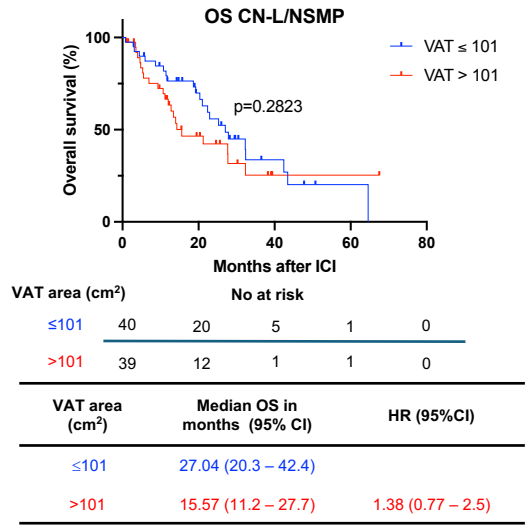

C.

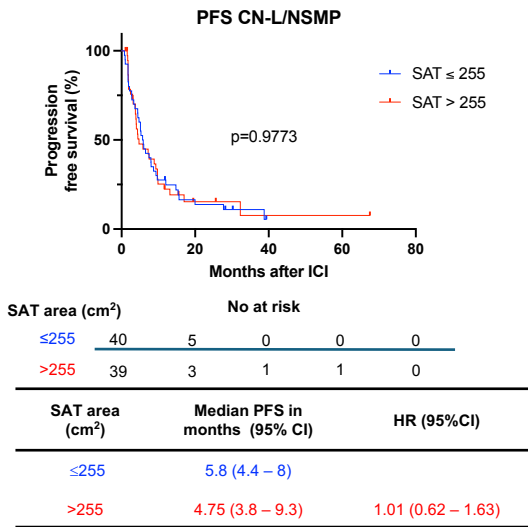

D.

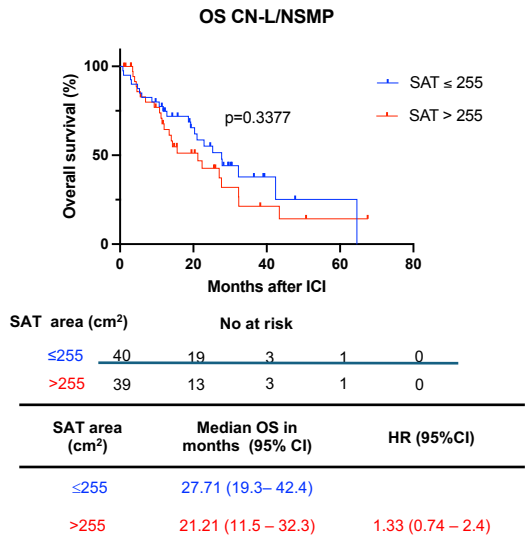

**Supplemental Figure 10. Survival outcomes in CN-L/NSMP EC stratified by VAT and SAT area.** Kaplan-Meier curves for (A) PFS and (B) OS in patients with EC following ICI treatment stratified by low and high VAT area (n=79) (Low VAT area: ≤101 cm<sup>2</sup> in blue; High VAT area: >101 cm<sup>2</sup> in red). Kaplan-Meier curves for (C) PFS and (D) OS in patients with EC following ICI treatment stratified by low and high SAT area (Low SAT area: ≤255 cm<sup>2</sup> in blue; High SAT area: >255 cm<sup>2</sup> in red) (n=79). Patients were categorized as low or high VAT /SAT based on the median SAT and VAT area of the CN-L/NSMP EC patients with available radiological data. The P values were calculated using a log-rank test. HRs and 95% CIs for overweight and obese patients were calculated using normal weight as a reference. BMI, body mass index; VAT, visceral adipose tissue; SAT, subcutaneous adipose tissue; OS, overall survival; PFS, progression free survival; EC, endometrial cancer; ICI, immune checkpoint inhibitor; CN-L/NSMP, copy number-low/no specific molecular profile; HR, Hazard ratio; CI, confidence interval.

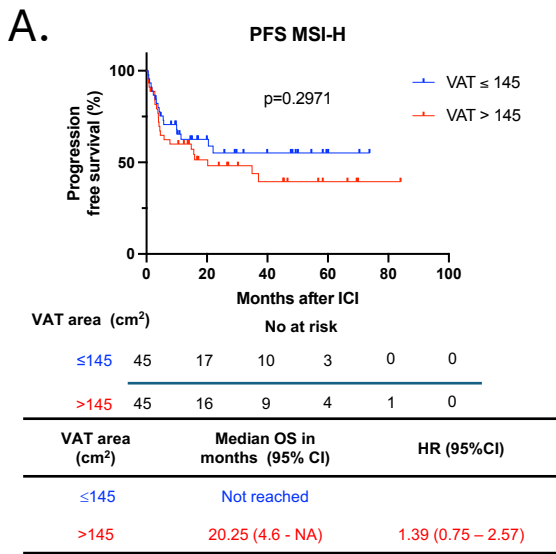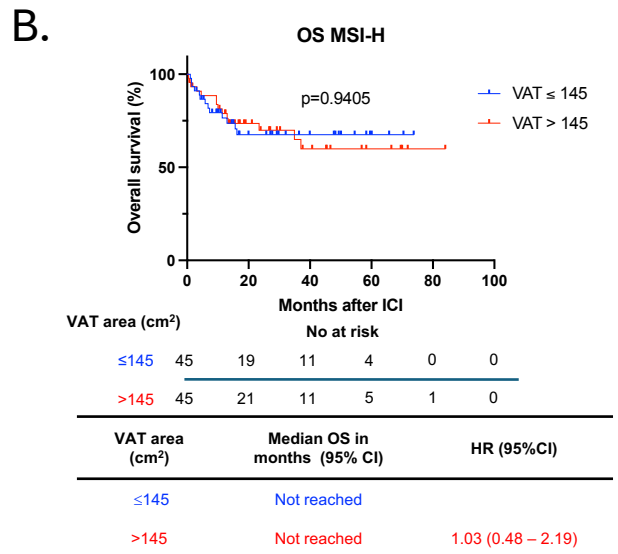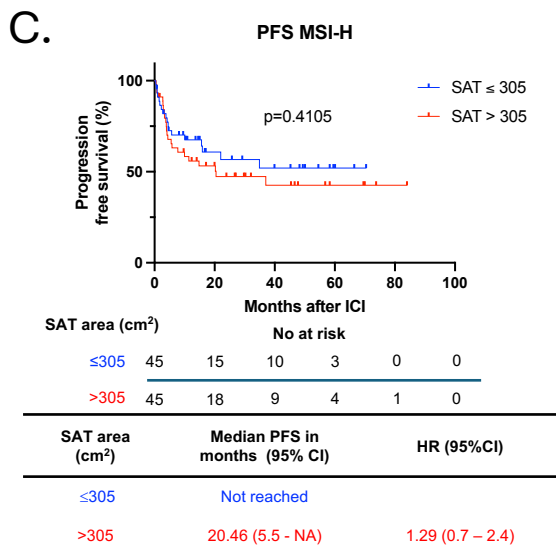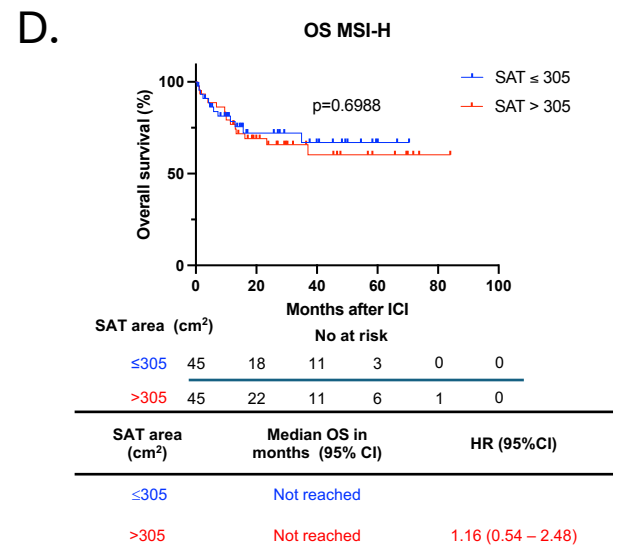

**Supplemental Figure 11. Survival outcomes in MSI-H EC stratified by VAT and SAT area.** Kaplan-Meier curves for (A) PFS and (B) OS in patients with EC following ICI treatment stratified by low and high VAT area (n=90) (Low VAT area: ≤145 cm<sup>2</sup> in blue; High VAT area: >145 cm<sup>2</sup> in red). Kaplan-Meier curves for (C) PFS and (D) OS in patients with EC following ICI treatment stratified by low and high SAT area (Low SAT area: ≤305 cm<sup>2</sup> in blue; High SAT area: >305 cm<sup>2</sup> in red) (n=90). Patients were categorized as low or high VAT /SAT based on the median SAT and VAT area of the MSI-H EC patients with available radiological data. The P values were calculated using a log-rank test. HRs and 95% CIs for overweight and obese patients were calculated using normal weight as a reference. BMI, body mass index; VAT, visceral adipose tissue; SAT, subcutaneous adipose tissue; OS, overall survival; PFS, progression free survival; EC, endometrial cancer; ICI, immune checkpoint inhibitor; MSI-H, microsatellite instability-high; HR, Hazard ratio; CI, confidence interval.

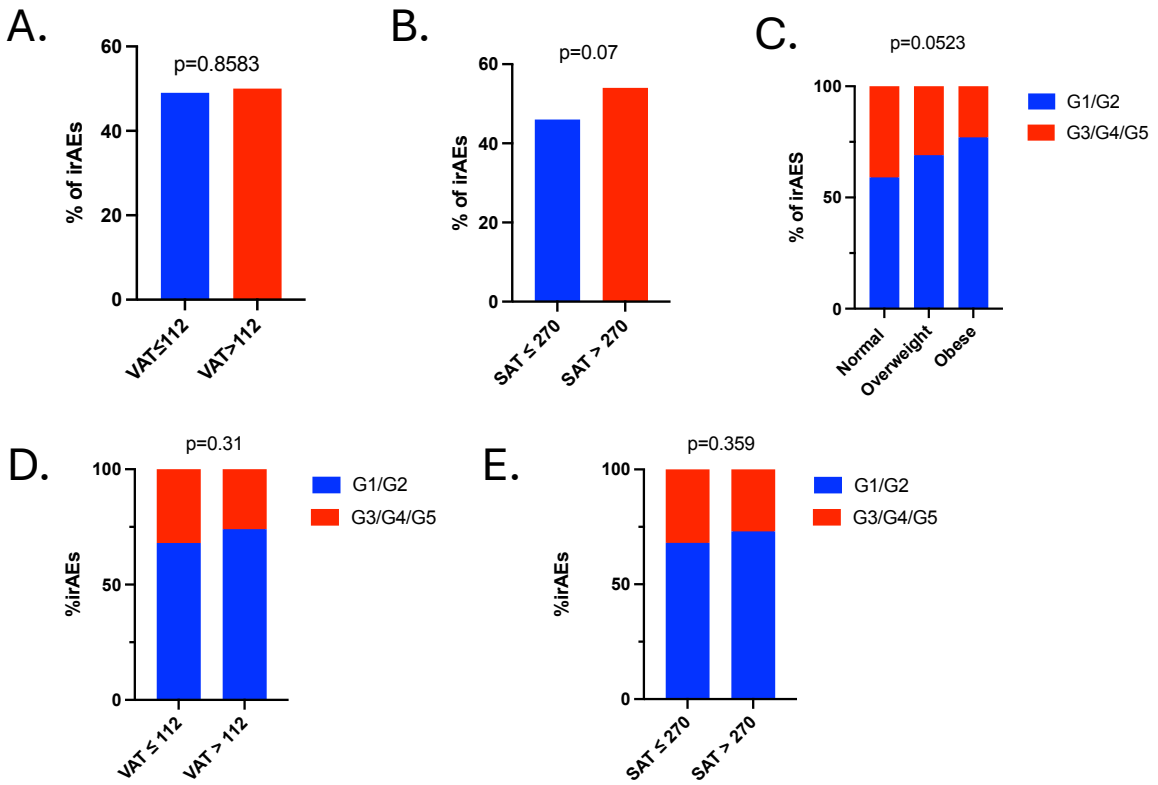

**Supplemental Figure 12. Incidence of irAEs in EC patients after treatment with ICI stratified by BMI, VAT and SAT**  
 Percentage of irAEs stratified by (A) VAT area and (B) SAT area (n=500). Percentage of mild/moderate (G1/G2) irAEs vs severe (G3/G4/G5) irAEs stratified by (C) BMI (D) VAT area, and (E) SAT area (n=500). The P value in the bar graph was calculated using chi-squared test. BMI, body mass index; VAT, visceral adipose tissue; SAT, subcutaneous adipose tissue; EC, endometrial cancer; ICI, immune checkpoint inhibitor; irAEs, immune related adverse events; G1/G2, Grade 1 and Grade 2; G3/G4/G5, Grade 3, Grade 4 and Grade 5.

|                                                 | All n=437          | Normal BMI<br>n=114 | Overweight<br>n=133 | Obese<br>n=190   | p value  |      |
|-------------------------------------------------|--------------------|---------------------|---------------------|------------------|----------|------|
| <b>Median age (range)</b>                       | 67 (40 – 94)       | 67 (41 – 89)        | 68 (43 – 94)        | 66 (40 – 88)     | 0.02     |      |
| <b>Median BMI, kg/m<sup>2</sup> (range)</b>     | 28.8 (18.5 – 59.4) | 22.5 (18.5 – 24.9)  | 27 (25 – 29.9)      | 35.1 (30 – 59.4) | < 0.0001 |      |
| <b>Self-reported race - No (%)</b>              |                    |                     |                     |                  |          |      |
| • White:                                        | 293 (67)           | 75 (66)             | 99 (74)             | 119 (63)         | 0.01     |      |
| • Black:                                        | 65 (15)            | 13 (11)             | 17 (13)             | 35 (18)          |          |      |
| • Asian:                                        | 36 (8)             | 14 (12)             | 12 (9)              | 10 (5)           |          |      |
| • Unknown:                                      | 43 (10)            | 12 (11)             | 5 (4)               | 26 (14)          |          |      |
| <b>Histology – No (%)</b>                       |                    |                     |                     |                  |          |      |
| • Endometrioid                                  | 166 (38)           | 38 (33)             | 48 (36)             | 80 (42)          | 0.12     |      |
| ○ Low grade (1,2)                               | 107 (24)           | 27 (24)             | 33 (25)             | 47 (25)          |          |      |
| ○ High grade (3)                                | 59 (14)            | 11 (10)             | 15 (11)             | 33 (17)          |          |      |
| • Serous                                        | 112 (26)           | 23 (20)             | 40 (30)             | 49 (26)          |          |      |
| • Mixed/high-grade NOS                          | 68 (16)            | 17 (15)             | 20 (15)             | 31 (16)          |          |      |
| • Carcinosarcoma                                | 59 (14)            | 22 (19)             | 17 (13)             | 20 (11)          |          |      |
| • Clear Cell                                    | 20 (5)             | 7 (6)               | 6 (5)               | 7 (4)            |          |      |
| • Un- / Dedifferentiated                        | 12 (3)             | 7 (6)               | 2 (2)               | 3 (2)            |          |      |
| <b>Checkpoint inhibitor – No (%)</b>            |                    |                     |                     |                  |          |      |
| • Pembrolizumab:                                | 346 (79)           | 83 (73)             | 106 (80)            | 157 (83)         |          | 0.34 |
| • Durvalumab:                                   | 68 (16)            | 21 (18)             | 22 (17)             | 25 (13)          |          |      |
| • Nivolumab:                                    | 14 (3)             | 6 (5)               | 4 (3)               | 4 (2)            |          |      |
| • Other:                                        | 9 (2)              | 4 (4)               | 1 (1)               | 4 (2)            |          |      |
| <b>Combination therapies – No (%)</b>           |                    |                     |                     |                  |          |      |
| • Lenvatinib/pembrolizumab:                     | 260 (59)           | 62 (54)             | 80 (60)             | 118 (62)         | 0.76     |      |
| • Tremelimumab/durvalumab:                      | 30 (7)             | 10 (9)              | 8 (6)               | 12 (6)           |          |      |
| • ICI alone:                                    | 138 (32)           | 38 (33)             | 43 (32)             | 57 (30)          |          |      |
| • Other combination:                            | 9 (2)              | 4 (4)               | 2 (2)               | 3 (2)            |          |      |
| <b>ECOG Performance Status– No (%)</b>          |                    |                     |                     |                  |          |      |
| • 0:                                            | 208 (48)           | 56 (49)             | 73 (55)             | 79 (42)          | 0.18     |      |
| • 1:                                            | 217 (50)           | 55 (48)             | 56 (42)             | 106 (56)         |          |      |
| • 2-3                                           | 12 (3)             | 3 (3)               | 4 (3)               | 5 (3)            |          |      |
| <b>Stage at diagnosis (1,2 vs 3,4) – No (%)</b> |                    |                     |                     |                  |          |      |
| • 1,2:                                          | 165 (38)           | 41(36)              | 50 (38)             | 74 (39)          | 0.87     |      |
| • 3,4:                                          | 272 (62)           | 73 (64)             | 83 (62)             | 116 (61)         |          |      |
| <b>Previous lines of therapy – No (%)</b>       |                    |                     |                     |                  |          |      |
| • 0                                             | 20 (5)             | 8 (7)               | 7 (5)               | 5 (3)            | 0.17     |      |
| • 1                                             | 236 (54)           | 50 (44)             | 73 (55)             | 113 (59)         |          |      |
| • 2                                             | 118 (27)           | 35 (31)             | 36 (27)             | 47 (25)          |          |      |
| • ≥ 3                                           | 63 (14)            | 21 (18)             | 17 (13)             | 25 (13)          |          |      |
| <b>Previous pelvic radiotherapy – No (%)</b>    |                    |                     |                     |                  |          |      |
| • Yes                                           | 237 (54)           | 57 (50)             | 80 (60)             | 100 (53)         | 0.24     |      |
| • No                                            | 200 (46)           | 57 (50)             | 53 (40)             | 90 (47)          |          |      |
| <b>Molecular subtype – No (%)</b>               |                    |                     |                     |                  |          |      |
| • CN-H/ <i>TP53</i> abn                         | 256 (59)           | 66 (58)             | 77 (58)             | 113 (59)         | 0.06     |      |
| • MSI-H                                         | 97 (22)            | 21 (18)             | 25 (19)             | 51 (27)          |          |      |
| • CN-L/NSMP                                     | 81 (19)            | 25 (22)             | 31 (23)             | 25 (13)          |          |      |
| • POLE                                          | 3 (0.7)            | 2 (2)               | 0 (0)               | 1 (0.5)          |          |      |

**Supplemental Table 1. Clinical characteristics of EC patients with available molecular subtype.** BMI, body mass index; ECOG, Eastern Cooperative Oncology Group; CPN-H/*TP53*abn, copy number-high/*TP53*abnormal; CN-L/NSMP, copy number-low/no specific molecular profile; MSI-H, microsatellite instability high; VAT, visceral adipose tissue; SAT, subcutaneous adipose tissue. P values in table come from Kruskal-Wallis, chi-squared or Fisher's exact tests.

| BMI (Kg/m <sup>2</sup> )                   | Pneumonitis | Myocarditis | Neurological | Ocular  | Hematologic |
|--------------------------------------------|-------------|-------------|--------------|---------|-------------|
| <b>Normal<br/>(18.5 – 24.9) – No (%)</b>   | 1 (0.8)     | 0 (0)       | 3 (2)        | 0 (0)   | 1 (0.8)     |
| <b>Overweight<br/>(25 – 29.9) – No (%)</b> | 1 (0.6)     | 2 (1)       | 0 (0)        | 1 (0.6) | 1 (0.6)     |
| <b>Obese<br/>(≥ 30) – No (%)</b>           | 2 (0.9)     | 1 (0.4)     | 2 (0.9)      | 1 (0.4) | 0 (0)       |
| <b>Total - No (%)</b>                      | 4 (0.7)     | 3 (0.6)     | 5 (1)        | 2 (0.4) | 2 (0.4)     |
| <b>p value</b>                             | 1           | 0.5         | 0.1          | 1       | 0.3         |

**Supplemental Table 2. irAEs per organ system in EC patients after treatment with ICI stratified by BMI.** Absolute number and percentage of irAEs per organ system across BMI categories Normal - BMI: 18.5 – 24.9 kg/m<sup>2</sup>; Overweight – BMI 25 – 29.9 kg/m<sup>2</sup>; Obese – BMI > 30 kg/m<sup>2</sup>. P-values in were calculated with Fisher's exact test. BMI, body mass index; EC, endometrial cancer; ICI, immune checkpoint inhibitor; irAEs, immune related adverse events.
